# Supplementary material
Source: PubMed Central journal article supplement (PMC1748187)

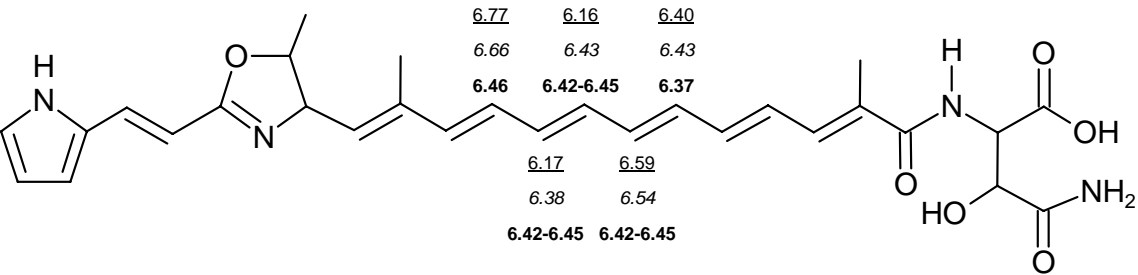

Supplement: pnas_0606039103_1.pdf [file pnas_0606039103_1.pdf]
